# Supplementary material for: Ultra‐Fast‐Track Extubation in Adult Congenital Heart Surgery
Source: PubMed Central journal article supplement — J Am Heart Assoc. 2021 May 17;10(11):e020201. doi: 10.1161/JAHA.120.020201 (PMC8483528; doi:10.1161/jaha.120.020201), 2021-05-17
Supplement: JAH3-10-e020201-s001.pdf [file JAH3-10-e020201-s001.pdf]

# **SUPPLEMENTAL MATERIAL**

**Figure S1. The distribution of propensity scores between the early extubation (EE) and conventional extubation (CE) groups before (A,C) and after propensity score matching (B,D), also represented on a jitter plot.**

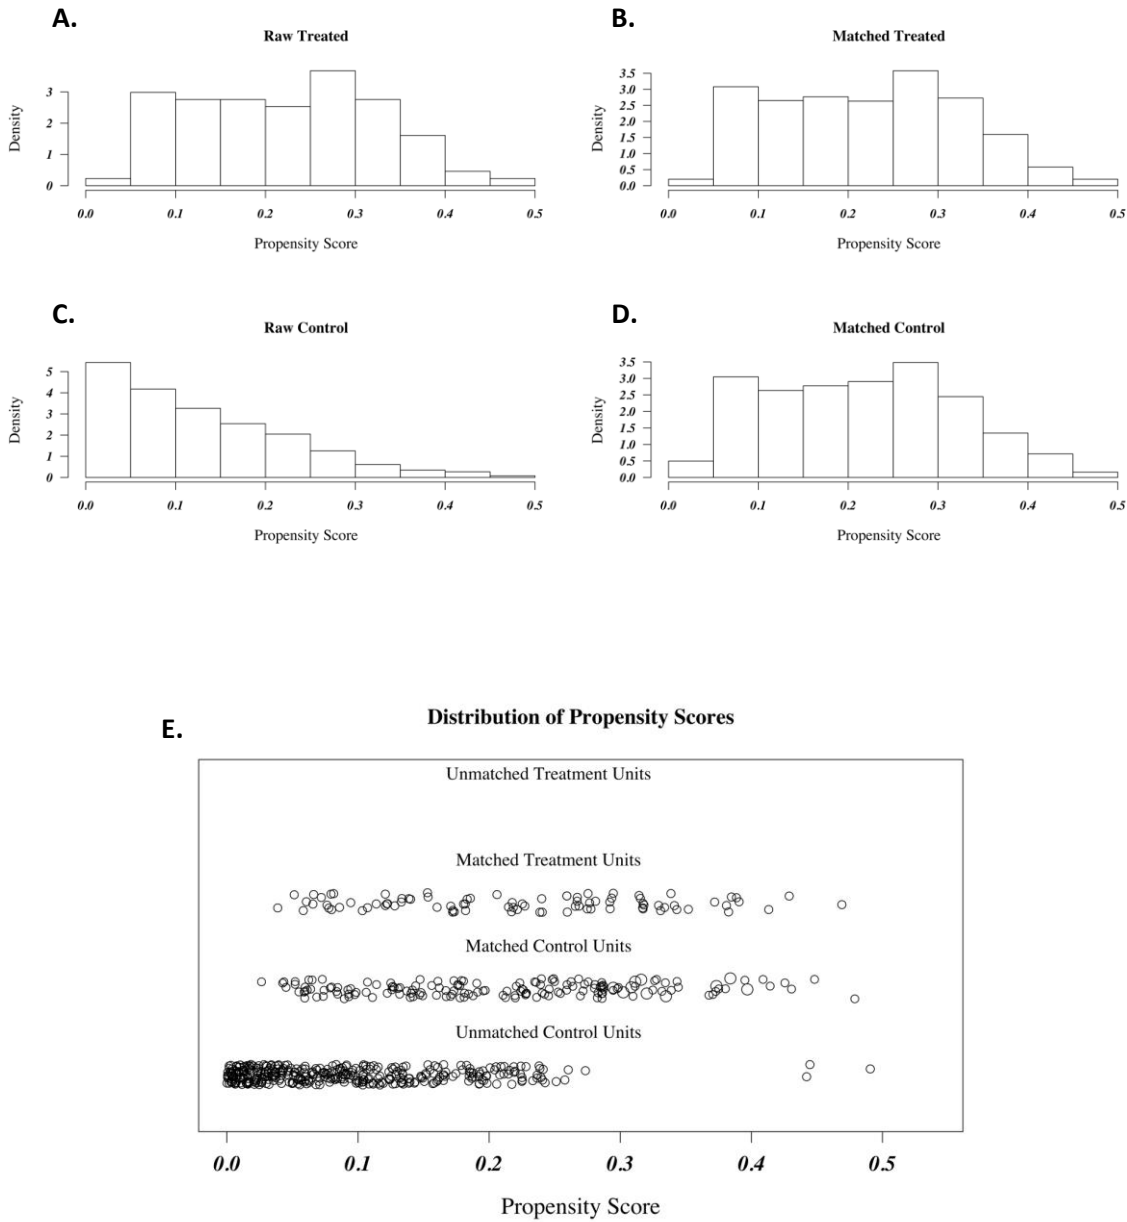

**Figure S2. Absolute standardised mean differences before and after propensity score matching.**

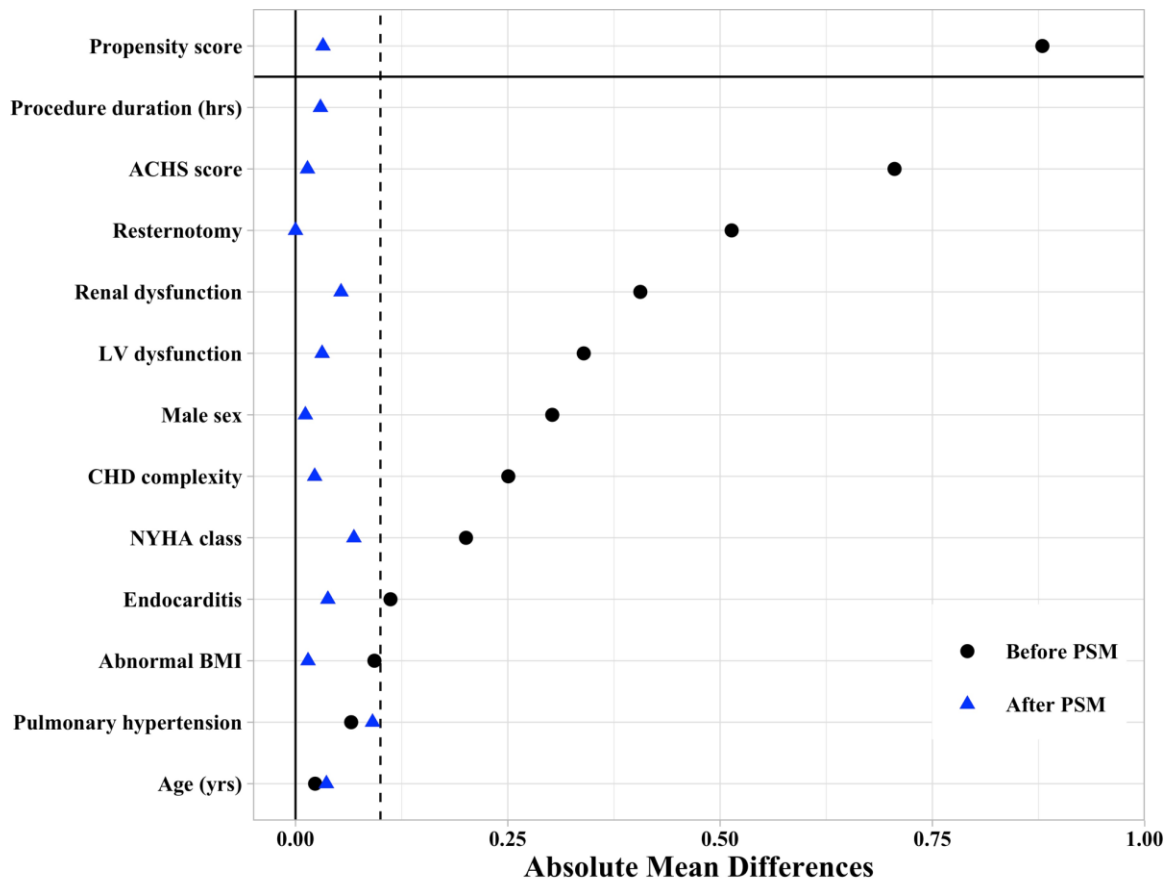

After matching, the standardised mean difference is  $<0.1$  for each variable, indicating univariable balance between exposure groups. ACHS, Adult Congenital Heart Surgery; CHD, congenital heart disease; LV, left ventricle; NYHA FC, New York Heart Association functional class; PSM, propensity score matching.
